# Supplementary material for: Revealing the synergetic interaction between amino and carbonyl functional groups and their effect on the electronic and optical properties of carbon dots
Source: Royal Society of Chemistry journal article supplement (doi:10.1039/d2cp03401h), 2022-01-01
Supplement: d2cp03401h1.pdf [file d2cp03401h1.pdf]

Electronic Supplementary Information (ESI)

## Revealing the Synergetic Interaction between Amino and Carbonyl Functional Groups on the Electronic and Optical Properties of Carbon Dots

Arum Sinda Santika<sup>a</sup>, Fitri Aulia Permatasari<sup>a,b</sup>, Reza Umami<sup>a</sup>, Diva Addini Maghribi

Muyassiroh<sup>a</sup>, Muhammad Alief Irham<sup>a,b</sup>, Pipit Fitriani<sup>a,b,c</sup>, and Ferry Iskandar<sup>a,b,c,\*</sup>

<sup>a</sup>Department of Physics, Faculty of Mathematics and Natural Sciences, Institut Teknologi Bandung, Jalan Ganesha 10, Bandung, West Java, Indonesia 40132

<sup>b</sup> Collaboration Research Center for Advanced Energy Materials, National Research and Innovation Agency - Institut Teknologi Bandung, Jalan Ganesha 10, Bandung, West Java 40132, Indonesia

<sup>c</sup> Research Center for Nanoscience and Nanotechnology, Institut Teknologi Bandung, Jalan Ganesha 10 Bandung, Indonesia 40132.

\* Corresponding email: [ferry@fi.itb.ac.id](mailto:ferry@fi.itb.ac.id)

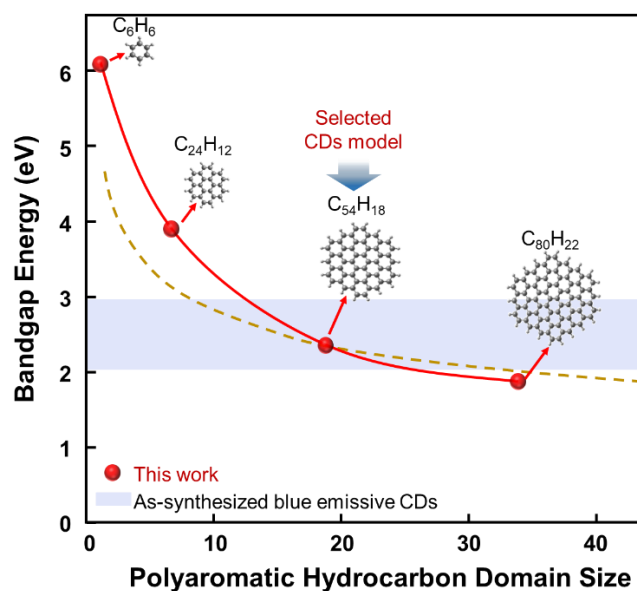

Figure S1. Bandgap energy relation with the polyaromatic hydrocarbon size.

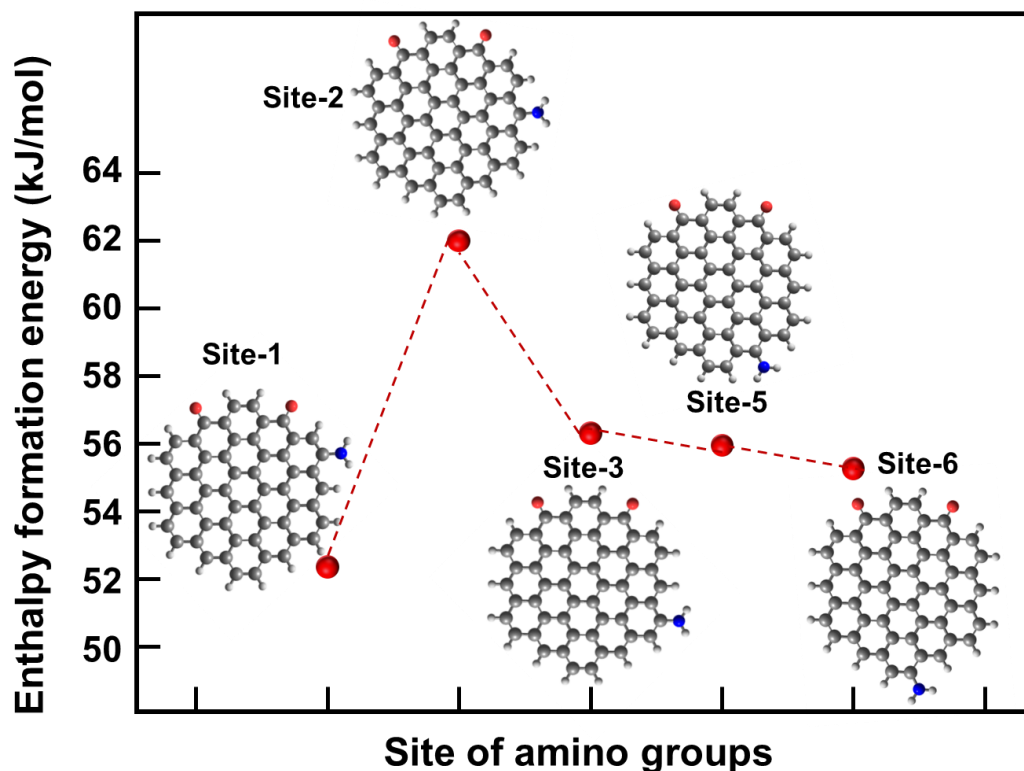

**Figure S2.** Enthalpy formation energy of amino CDs carbonyl models in various functional groups position.

**Table S1** Excitation energies, wavelengths, oscillator strengths, transition coefficients and percentage transition contribution of excited states in Carbonyl CDs.

| CDs carbonyl            | Sn | Exc. energy (eV) | Wavelength absorbance (nm) | Oscillator (a.u.) | Transition | Contribution (%) | Carbon |        | Oxygen |        |
|-------------------------|----|------------------|----------------------------|-------------------|------------|------------------|--------|--------|--------|--------|
|                         |    |                  |                            |                   |            |                  | Occ.   | Unocc. | Occ.   | Unocc. |
| O/C=0<br>(Pristine CDs) | S1 | 2.2346           | 554.84                     | 0.0000            | H-1→L      | 50               | 1.00   | 1.00   | -      | -      |
|                         |    |                  |                            |                   | H→L+1      | 50               | 1.00   | 1.00   | -      | -      |
|                         | S3 | 2.8098           | 441.26                     | 1.3035            | H-1→L+1    | 39               | 1.00   | 1.00   | -      | -      |
|                         |    |                  |                            |                   | H→L        | 39               | 1.00   | 1.00   | -      | -      |
| O/C=0.04                | S1 | 1.1253           | 1101.76                    | 0.1418            | H→L        | 100              | 0.95   | 0.86   | 0.05   | 0.14   |
|                         | S2 | 1.9379           | 639.79                     | 0.2243            | H-1→L      | 90               | 0.97   | 0.86   | 0.03   | 0.14   |
| O/C=0.07                | S1 | 1.5012           | 825.89                     | 0.0010            | H→L+1      | 100              | 0.92   | 0.80   | 0.08   | 0.20   |
|                         | S2 | 1.7242           | 719.07                     | 0.5096            | H→L        | 100              | 0.92   | 0.86   | 0.08   | 0.14   |
| O/C=0.11                | S1 | 1.6323           | 759.58                     | 0.0665            | H→L        | 75               | 0.88   | 0.75   | 0.12   | 0.25   |
|                         | S2 | 1.657            | 748.24                     | 0.0195            | H-1→L      | 70               | 0.92   | 0.75   | 0.08   | 0.25   |

**Table S2** Excitation energies, wavelengths, oscillator strengths, transition coefficients and percentage transition contribution of excited states in Amino CDs.

| Amino CDs       | Sn | Exc. energy (eV) | Wavelength absorption (nm) | Oscillator (a.u.) | Transition | Contribution (%) | Carbon |        | Nitrogen |        |
|-----------------|----|------------------|----------------------------|-------------------|------------|------------------|--------|--------|----------|--------|
|                 |    |                  |                            |                   |            |                  | Occ.   | Unocc. | Occ.     | Unocc. |
| <b>N/C=0.02</b> | S1 | 2.1910           | 565.86                     | 0.0180            | H→L        | 59%              | 0.95   | 1.00   | 0.05     | 0.00   |
|                 |    |                  |                            |                   | H-1→L+1    | 35%              | 1.00   | 0.99   | 0.00     | 0.01   |
|                 | S3 | 2.7060           | 458.15                     | 0.9610            | H-1→L      | 35%              | 1.00   | 1.00   | 0.00     | 0.00   |
|                 |    |                  |                            |                   | H-1→L+1    | 26%              | 1.00   | 0.99   | 0.00     | 0.01   |
| <b>N/C=0.06</b> | S1 | 2.0758           | 597.27                     | 0.0000            | H→L+1      | 50%              | 0.88   | 0.96   | 0.12     | 0.04   |
|                 |    |                  |                            |                   | H-1→L      | 50%              | 0.89   | 0.95   | 0.11     | 0.05   |
|                 | S3 | 2.5696           | 482.50                     | 1.1984            | H-1→L      | 26%              | 0.89   | 0.95   | 0.11     | 0.05   |
|                 |    |                  |                            |                   | H→L+1      | 26%              | 0.88   | 0.96   | 0.12     | 0.04   |
| <b>N/C=0.11</b> | S1 | 1.9268           | 589.81                     | 0.0000            | H→L+1      | 34%              | 0.85   | 0.95   | 0.15     | 0.05   |
|                 |    |                  |                            |                   | H-1→L      | 34%              | 0.85   | 0.95   | 0.15     | 0.05   |
|                 | S3 | 2.3653           | 483.57                     | 1.1281            | H-1→L+1    | 38%              | 0.85   | 0.95   | 0.15     | 0.05   |
|                 |    |                  |                            |                   | H→L        | 38%              | 0.85   | 0.95   | 0.15     | 0.05   |
| <b>N/C=0.22</b> | S1 | 1.9617           | 632.04                     | 0.0067            | H→L        | 51%              | 0.87   | 0.97   | 0.13     | 0.03   |
|                 |    |                  |                            |                   | H-1→L+1    | 37%              | 0.89   | 0.98   | 0.11     | 0.02   |
|                 | S3 | 2.348            | 528.04                     | 0.8245            | H-1→L+1    | 59%              | 0.89   | 0.98   | 0.11     | 0.02   |
|                 |    |                  |                            |                   | H→L        | 41%              | 0.87   | 0.97   | 0.13     | 0.03   |
